# Supplementary material for: Dynamic allostery drives autocrine and paracrine TGF-β signaling
Source: PubMed Central journal article supplement (PMC11531391; doi:10.1016/j.cell.2024.08.036), 2024-09-16
Supplement: NIHMS2024290-supplement-11.pdf [file NIHMS2024290-supplement-11.pdf]

**Table S1.** Histology scores of mice, related to Figure 1K and 1L. The table represents histologic analysis and disease scoring of hematoxylin and eosin stained tissue sections of heart, lung, and liver in WT/WT, KI/KI and KO/KO.

| Mouse | Genotype | Days | Weight loss? | Skin | Lung | Heart | Liver | Spleen          | Kidney | Small bowel | Colon | Score (Total) |
|-------|----------|------|--------------|------|------|-------|-------|-----------------|--------|-------------|-------|---------------|
| 1     | KO/KO    | 23   | Yes          | 0    | 3    | 3     | 3     | ND <sup>1</sup> | 0      | 0           | 0     | 9             |
| 2     | KO/KO    | 23   | Yes          | 0    | 3    | 3     | 2     | ND              | 0      | 0           | 0     | 8             |
| 3     | KO/KO    | 23   | Yes          | 1    | 2    | 3     | 2     | ND              | 0      | 0           | 0     | 7             |
| 4     | KO/KO    | 18   | Yes          | 0    | 1    | 0     | 2     | 0               | 0      | 0           | 3     | 3             |
| 5     | KO/KO    | 18   | Yes          | 0    | 2    | 2     | 2     | 0               | 0      | 0           | 3     | 6             |
| 6     | KO/KO    | 18   | Yes          | 0    | 1    | 1     | 1     | 0               | 0      | 0           | 1     | 3             |
| 7     | WT/WT    | 18   | No           | 0    | 0    | 0     | 0     | 0               | 0      | 0           | 0     | 0             |
| 8     | WT/WT    | 18   | No           | 0    | 0    | 0     | 0     | 0               | 0      | 0           | 3     | 0             |
| 9     | WT/WT    | 18   | No           | 0    | 0    | 0     | 1     | 0               | 0      | ND          | 0     | 1             |
| 10    | WT/WT    | 23   | No           | 0    | 0    | 0     | 0     | 0               | 0      | 0           | 0     | 0             |
| 11    | WT/WT    | 21   | No           | 0    | 0    | 0     | 1     | 0               | 0      | 0           | 0     | 1             |
| 12    | WT/WT    | 21   | No           | 0    | 0    | 0     | 0     | 0               | 0      | 0           | 0     | 0             |
| 13    | WT/WT    | 23   | No           | 0    | 0    | 0     | 0     | ND              | ND     | 0           | 0     | 0             |
| 14    | KI/WT    | 19   | No           | 0    | 0    | 0     | 0     | 0               | 0      | 0           | 0     | 0             |
| 15    | KI/WT    | 21   | No           | 0    | 0    | 0     | 0     | 0               | 0      | ND          | ND    | 0             |
| 16    | KI/WT    | 21   | No           | 0    | 0    | 0     | 0     | 0               | 0      | 0           | 0     | 0             |
| 17    | KI/WT    | 63   | No           | 0    | 0    | 0     | 0     | 0               | 0      | 0           | 0     | 0             |
| 18    | KI/KI    | 31   | Yes          | 0    | 0    | 0     | 0     | 0               | 0      | 0           | 0     | 0             |
| 19    | KI/KI    | 21   | No           | 0    | 0    | 0     | 0     | 0               | 0      | 0           | 0     | 0             |
| 20    | KI/KI    | 19   | No           | 0    | 0    | 0     | 1     | 0               | 0      | 0           | 0     | 1             |
| 21    | KI/KI    | 19   | No           | 0    | 0    | 0     | 0     | 0               | 0      | 0           | 0     | 0             |
| 22    | KI/KI    | 22   | Yes          | 0    | 0    | 1     | 1     | ND              | 0      | 0           | 0     | 2             |
| 23    | KI/KI    | 22   | No           | 0    | 1    | 1     | 1     | ND              | 0      | 0           | 0     | 3             |
| 24    | KI/KI    | 122  | No           | 0    | 1    | 0     | 0     | ND              | 0      | 0           | 0     | 1             |

<sup>1</sup> Not Done
